# Supplementary material
Source: MDPI journal article supplement (https://www.mdpi.com/2079-9284/8/3/80)
Supplement: s1 [file s1]

Archive with 3 entries (3 files):
- Supplementary material Figure S2 Additional plots.pdf
- Supplementary material Figure S3 Plots of MoA categories.pdf
- Supplementary material Table S1 List of substances including acceptance of mechanism-of-action and structures.pdf
