# Supplementary material
Source: MDPI journal article supplement (https://www.mdpi.com/2079-9284/8/3/80)
Supplement: s1 [file s1 › Supplementary material Figure S2 Additional plots.pdf]

## Supporting Information Figure S2:

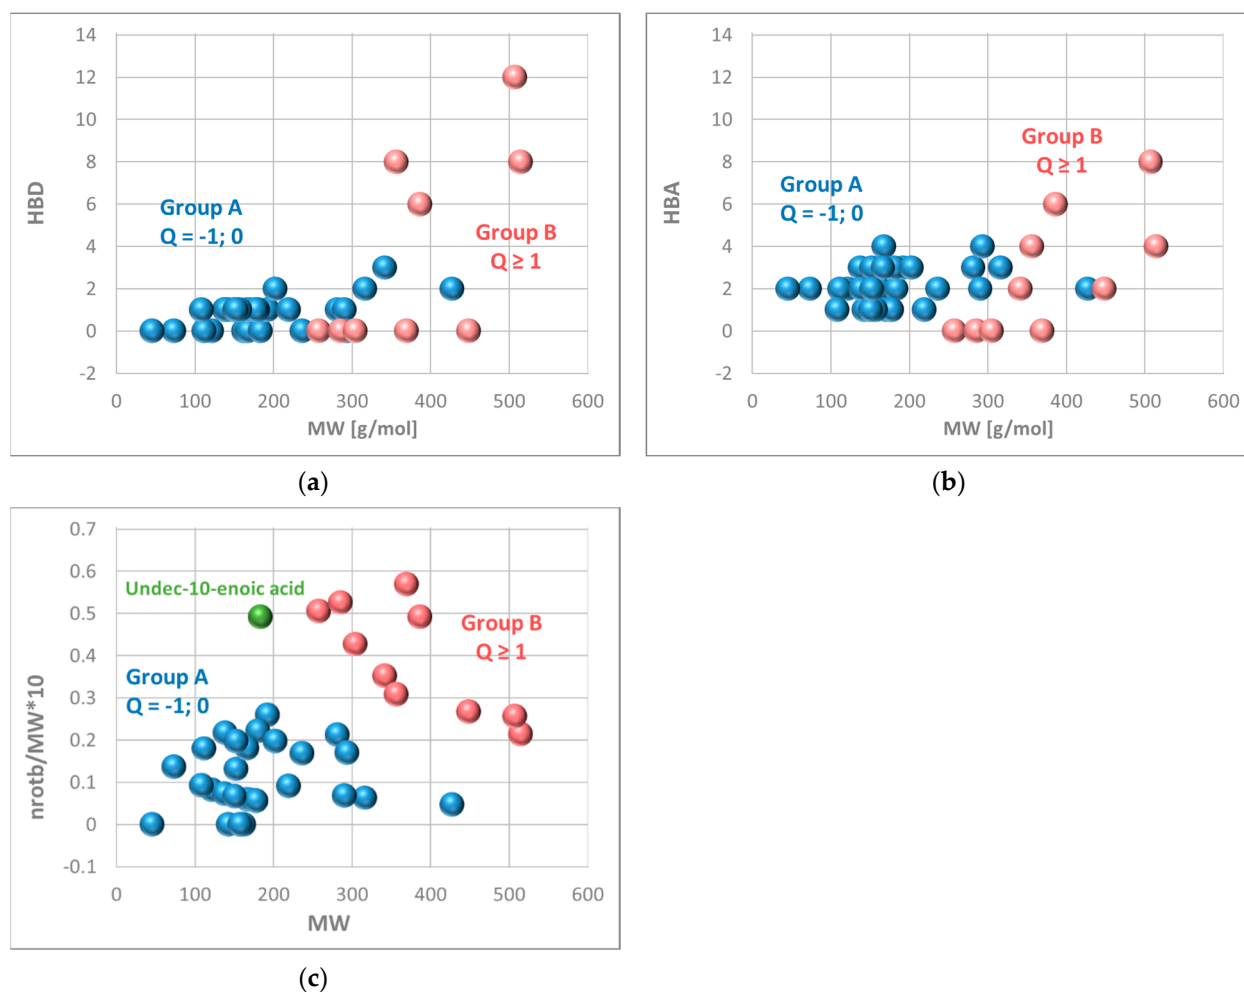

**Figure S2.** Two-dimensional plots including position of neutral or anionic (blue) and cationic (red) preservatives in chemical space: (a) plot of number of hydrogen-bonding donors (HBD) vs. MW; (b) plot of number of hydrogen-bonding acceptors (HBA) vs. MW; (c) plot of relative flexibility (nrotb/MW \*10) vs. molecular weight (MW).
