# Supplementary material
Source: MDPI journal article supplement (https://www.mdpi.com/2079-9284/8/3/80)
Supplement: s1 [file s1 › Supplementary material Table S1 List of substances including acceptance of mechanism-of-action and structures.pdf]

## Supporting Information Table S1

**Table S1.** List of Annex V substances, acceptance of underlying antimicrobial mechanism-of-action, and structures of predominant and active species which were used for calculation of molecular characteristics.

| Annex V ID | Substances                   | Acceptance of Mechanism-of-action? | pKa (conjugated acid)         | Predominant species structure                                                         | Active species structure                                                              |
|------------|------------------------------|------------------------------------|-------------------------------|---------------------------------------------------------------------------------------|---------------------------------------------------------------------------------------|
| 1          | Benzoic acid and its salts   | <i>accepted</i>                    | pKa=4.2                       | 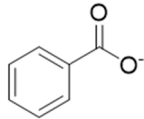   | 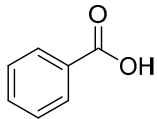   |
| 2          | Propionic acid and its salts | <i>accepted</i>                    | pKa=4.9                       | 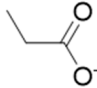   | 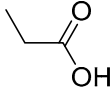   |
| 3          | Salicylic acid and its salts | <i>accepted</i>                    | pKa(COOH)=3.0<br>pKa(OH)=13.6 | 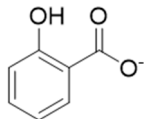  | 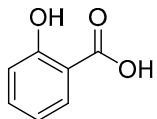  |
| 4          | Sorbic acid and its salts    | <i>accepted</i>                    | pKa=4.8                       | 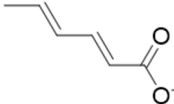 | 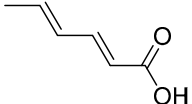 |

|        |                                              |                     |                                                                                                                                   |                                                                                       |                                                                                       |
|--------|----------------------------------------------|---------------------|-----------------------------------------------------------------------------------------------------------------------------------|---------------------------------------------------------------------------------------|---------------------------------------------------------------------------------------|
| 5      | Formaldehyde,<br>paraformaldehyde            | <i>not accepted</i> | pKa=13.7 (methanediol)                                                                                                            | 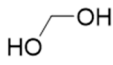   | $=O$                                                                                  |
| 7      | Biphenyl-2-ol                                | <i>accepted</i>     | pKa=9.5                                                                                                                           | 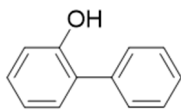   | 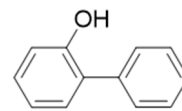   |
| 8      | Pyrithione zinc<br>[here: pyrithione]        | <i>accepted</i>     | Formation constant log Kt =<br>5.3; pH<4.5 dissociates to<br>pyrithione. pH>9.5<br>hydrolyzes to ionic<br>pyrithione and zincate. | 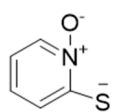   | 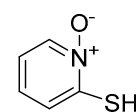   |
| 9      | Inorganic sulphites and<br>hydrogensulphites | <i>not accepted</i> | pKa=2.0<br>pKa=7.0                                                                                                                | 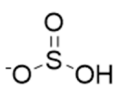   | 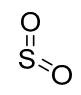   |
| 11     | Chlorobutanol                                | <i>accepted</i>     | -                                                                                                                                 | 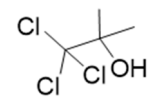  | 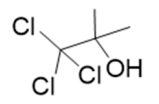  |
| 12 bis | Butyl 4-hydroxybenzoate                      | <i>accepted</i>     | pKa=8.4                                                                                                                           | 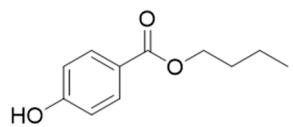 | 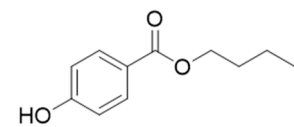 |

|        |                                  |                     |         |                                                                                       |                                                                                       |
|--------|----------------------------------|---------------------|---------|---------------------------------------------------------------------------------------|---------------------------------------------------------------------------------------|
| 12 bis | Propyl 4-hydroxybenzoate         | <i>accepted</i>     | pKa=8.7 | 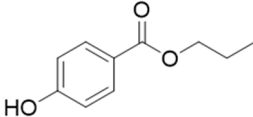   | 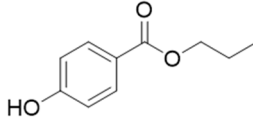   |
| 12     | Methylparaben                    | <i>accepted</i>     | pKa=8.4 | 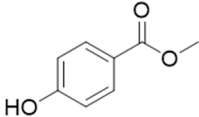   | 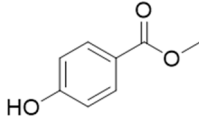   |
| 12     | Ethylparaben                     | <i>accepted</i>     | pKa=8.2 | 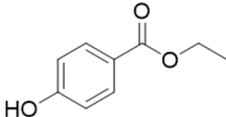   | 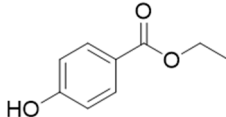   |
| 13     | Dehydroacetic acid and its salts | <i>accepted</i>     | pKa=5.3 | 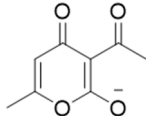   | 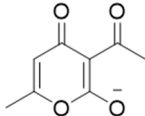   |
| 14     | Formic acid and its salts        | <i>accepted</i>     | pKa=3.7 | 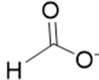  | 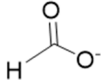  |
| 15     | Dibromohexamidine and its salts  | <i>accepted</i>     | pKa~12  | 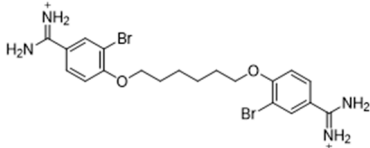 | 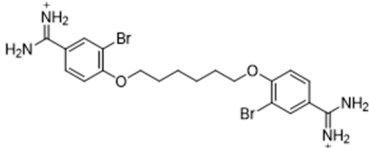 |
| 16     | Thiomersal                       | <i>not accepted</i> | -       | 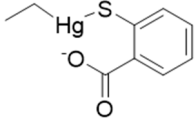 | 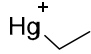 |

|    |                                            |                     |          |                                                                                       |                                                                                       |
|----|--------------------------------------------|---------------------|----------|---------------------------------------------------------------------------------------|---------------------------------------------------------------------------------------|
| 17 | Phenyl mercuric acetate                    | <i>not accepted</i> | -        | 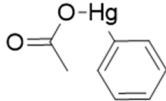   | 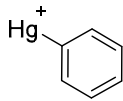   |
| 17 | Phenyl mercuric benzoate                   | <i>not accepted</i> | -        | 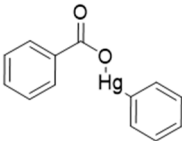   | 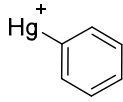   |
| 18 | Undec-10-enoic acid and its salts          | <i>accepted</i>     | pKa=4.9  | 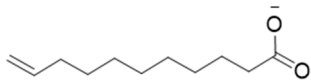   | 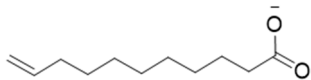   |
| 19 | Hexetidine                                 | <i>accepted</i>     | pKa=8.3  | 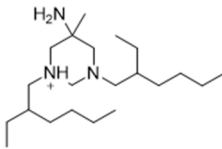   | 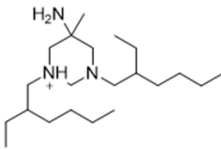   |
| 20 | 5-Bromo-5-nitro-1,3-dioxane (Bronidox)     | <i>not accepted</i> | pKa=9.6  | 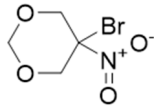  | 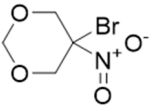  |
| 21 | 2-Bromo-2-nitropropane-1,3-diol (Bronopol) | <i>not accepted</i> | pKa=9.6  | 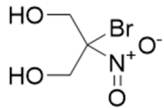 | 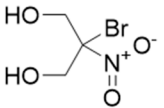 |
| 22 | 2,4-Dichlorobenzyl alcohol                 | <i>accepted</i>     | pKa=13.5 | 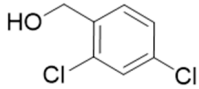 | 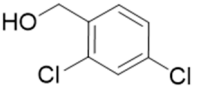 |

|    |                                                                                                                                  |                     |                                                    |                                                                                       |                                                                                       |
|----|----------------------------------------------------------------------------------------------------------------------------------|---------------------|----------------------------------------------------|---------------------------------------------------------------------------------------|---------------------------------------------------------------------------------------|
| 23 | 1-(4-Chlorophenyl)-3-(3,4-dichlorophenyl)urea<br>(Triclocarban)                                                                  | <i>accepted</i>     | pKa=12.7                                           | 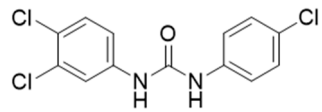   | 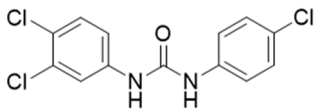   |
| 24 | Chlorocresol (4-Chlor-3-methylphenol)<br>(PCMC)                                                                                  | <i>accepted</i>     | pKa=9.6                                            | 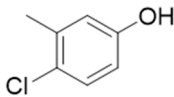   | 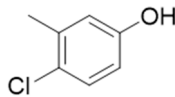   |
| 25 | 5-Chloro-2-(2,4-dichlorophenoxy)phenol<br>(Triclosan)                                                                            | <i>accepted</i>     | pKa=8.1                                            | 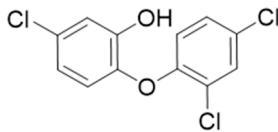   | 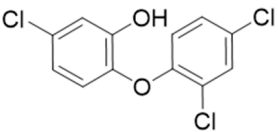   |
| 26 | Chloroxylenol                                                                                                                    | <i>accepted</i>     | pKa=9.8                                            | 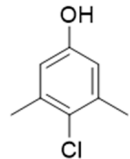   | 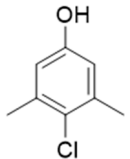   |
| 27 | N,N''-Methylenebis[N'-(3-(hydroxymethyl)-2,5-dioximidazolidin-4-yl)urea]<br>(Imidazolidinyl Urea)                                | <i>not accepted</i> | -                                                  | 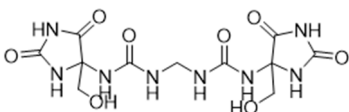  | 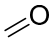   |
| 28 | Polyaminopropyl biguanide;<br>N-Hexylimidodicarbonimidic diamide HCl (1:1);<br>(SCCS: MW <sub>av</sub> ~4000; 22 monomers/chain) | <i>accepted</i>     | pKa=2-3 (conj. acid)<br>pKa=10.5-11.1 (conj. acid) | 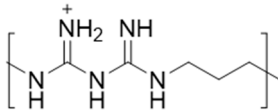 | 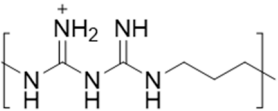 |

|    |                                                                                       |                     |                                                 |                                                                                       |                                                                                       |
|----|---------------------------------------------------------------------------------------|---------------------|-------------------------------------------------|---------------------------------------------------------------------------------------|---------------------------------------------------------------------------------------|
| 29 | 2-Phenoxyethanol                                                                      | <i>accepted</i>     | pKa=15.1                                        | 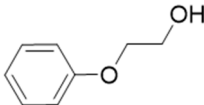   | 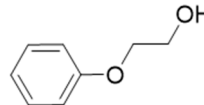   |
| 30 | Methenamine                                                                           | <i>not accepted</i> | pKa=8.5                                         | 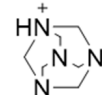   | 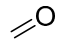   |
| 31 | Methenamine 3-chloroallylochloride (Quaternium-15)                                    | <i>not accepted</i> | pKa=3.7                                         | 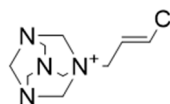   | 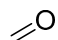   |
| 32 | 1-(4-Chlorophenoxy)-1-(imidazol-1-yl)-3,3-dimethylbutan-2-one (Climbazol)             | <i>accepted</i>     | pKa=5.2 (conj. acid)                            | 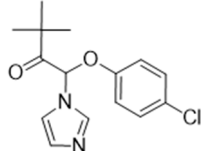   | 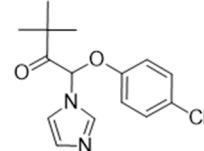   |
| 33 | 1,3-Bis(hydroxymethyl)-5,5-dimethylimidazolidine-2,4-dione (DMDM Hydantoin)           | <i>not accepted</i> | pKa=-3.5 (conj. acid)<br>pKa=-2.0. (conj. acid) | 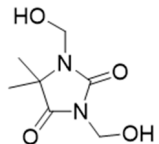  | 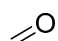   |
| 34 | Benzyl alcohol                                                                        | <i>accepted</i>     | pKa=15.4                                        | 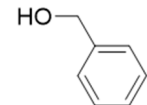 | 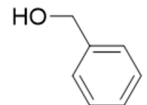 |
| 35 | 1-Hydroxy-4-methyl-6-(2,4,4-tri methylpentyl)-2 pyridon and its monoethanolamine salt | <i>accepted</i>     | pKa=5.9                                         | 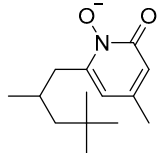 | 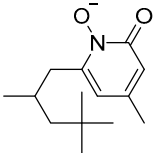 |

|    |                                                                |                     |                                   |                                                                                       |                                                                                       |
|----|----------------------------------------------------------------|---------------------|-----------------------------------|---------------------------------------------------------------------------------------|---------------------------------------------------------------------------------------|
| 37 | 2,2'-Methylenebis(6-bromo-4-chlorophenol)<br>(Bromochlorophen) | <i>accepted</i>     | -                                 | 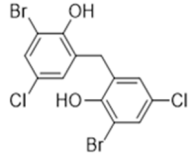   | 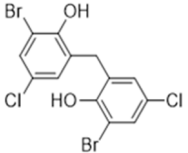   |
| 38 | 4-Isopropyl-m-cresol<br>(IPMP)                                 | <i>accepted</i>     | pKa=10.3                          | 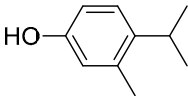   | 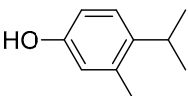   |
| 57 | 2-Methyl-2H-isothiazol-3-one<br>(MIT)                          | <i>not accepted</i> | -                                 | 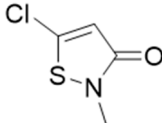   | 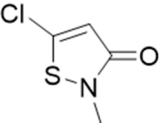   |
| 39 | Methylchloroisothiazolinone<br>(Annex V/39: mixture with MIT)  | <i>not accepted</i> | -                                 | 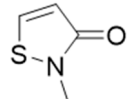   | 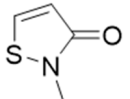   |
| 40 | 2-Benzyl-4-chlorophenol<br>(Chlorophene)                       | <i>accepted</i>     | pKa=9.8                           | 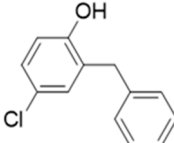  | 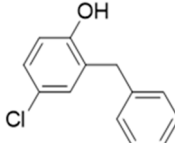  |
| 41 | 2-Chloroacetamide                                              | <i>not accepted</i> | pKa=-2.4 (conj. acid)<br>pKa=13.3 | 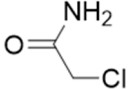 | 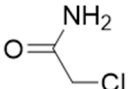 |
| 42 | Chlorhexidin and its salts                                     | <i>accepted</i>     | pKa=10.8 (conj. Acid)<br>pKa=10.8 | 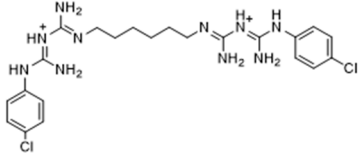 | 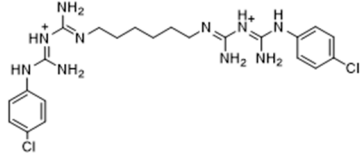 |

|    |                                                                                                                 |                     |         |                                                                                       |                                                                                     |
|----|-----------------------------------------------------------------------------------------------------------------|---------------------|---------|---------------------------------------------------------------------------------------|-------------------------------------------------------------------------------------|
| 43 | 1-Phenoxypropan-2-ol                                                                                            | <i>accepted</i>     | -       | 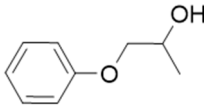   | 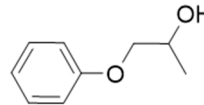 |
| 44 | Alkyl (C12-C22) trimethyl ammonium bromide and chloride;<br>[here: C12]                                         | <i>accepted</i>     | -       | 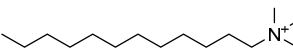   | 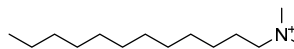 |
| 44 | Alkyl (C12-C22) trimethyl ammonium bromide and chloride;<br>[here: C16]                                         | <i>accepted</i>     | -       | 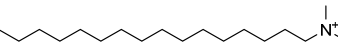   | 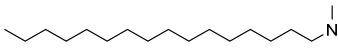 |
| 44 | Alkyl (C12-C22) trimethyl ammonium bromide and chloride;<br>[here: C22]                                         | <i>accepted</i>     | -       | 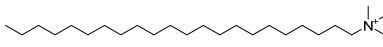   | 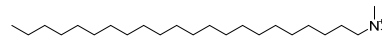 |
| 45 | 4,4-Dimethyl-1,3-oxazolidine                                                                                    | <i>not accepted</i> | pKa=9.3 |                                                                                       |                                                                                     |
| 46 | N-(Hydroxymethyl)-N-(dihydroxymethyl-1,3-dioxo-2,5-imidazolidinyl-4)-N'-(hydroxymethyl)urea (Diazolidinyl Urea) | <i>not accepted</i> | -       | 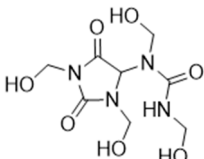 |                                                                                     |

|    |                                                                          |                     |                            |                                                                                       |                                                                                       |
|----|--------------------------------------------------------------------------|---------------------|----------------------------|---------------------------------------------------------------------------------------|---------------------------------------------------------------------------------------|
| 47 | Hexamidine and its salts                                                 | <i>accepted</i>     | pKa=12.5 (conj. acid)      | 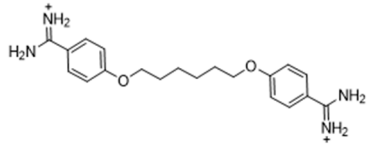   |                                                                                       |
| 48 | Glutaraldehyde                                                           | <i>not accepted</i> | -                          | 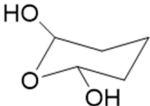   | 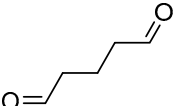   |
| 49 | 5-Ethyl-3,7-dioxa-1-azabicyclo[3.3.0] octane (7-Ethylbicyclooxazolidine) | <i>not accepted</i> | pKa=4.0 (conj. acid)       | 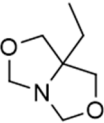   |                                                                                       |
| 50 | 3-(p-Chlorophenoxy)-propane-1,2-diol (Chlorphenesin)                     | <i>accepted</i>     | pKa=13.6                   | 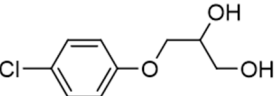   | 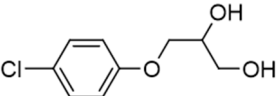   |
| 51 | Sodium hydroxymethylamino acetate                                        | <i>not accepted</i> | pKa=2.3 (COOH)<br>pka=10.3 | 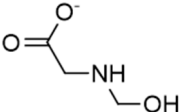  |                                                                                       |
| 52 | Silver Chloride on TiO2 [here: silver AgCl]                              | <i>not accepted</i> | -                          | AgCl                                                                                  | Ag <sup>+</sup>                                                                       |
| 53 | Benzethonium chloride                                                    | <i>accepted</i>     | -                          | 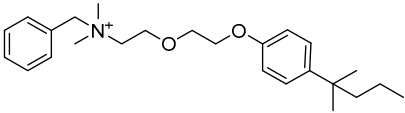 | 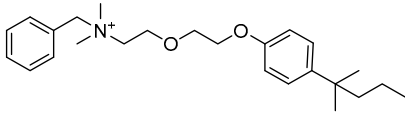 |

|    |                                                                                |                     |          |                                                                                     |                                                                                     |
|----|--------------------------------------------------------------------------------|---------------------|----------|-------------------------------------------------------------------------------------|-------------------------------------------------------------------------------------|
| 54 | Benzalkonium salts (C8-C18)<br>[here: C12]                                     | <i>accepted</i>     | -        | 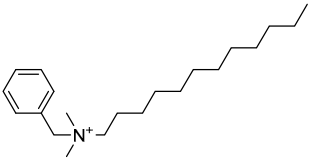 | 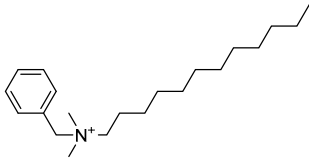 |
| 55 | Benzylhemiformal                                                               | <i>not accepted</i> | -        | 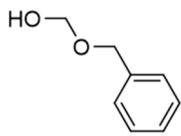 | 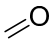 |
| 56 | 3-Iodo-2-propynylbutylcarbamate (Iodocarb)                                     | <i>accepted</i>     | -        | 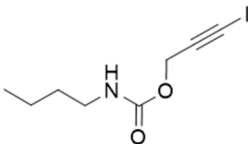 | 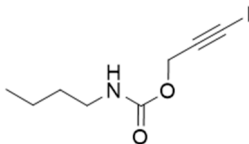 |
| 58 | Ethyl Lauroyl Arginate Hydrochloride                                           | <i>accepted</i>     | pKa=13.6 | 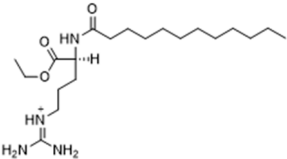 | 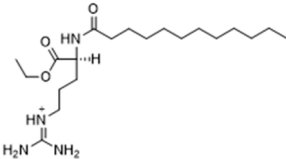 |
| 59 | Citric acid & silver chloride<br>[here: silver chloride; see also entry No 52] | <i>not accepted</i> | -        | AgCl                                                                                | Ag <sup>+</sup>                                                                     |
